# Supplementary material for: Risikofaktoren für und Stabilität einer Persönlichkeitsstörung vom Jugendalter bis ins junge Erwachsenenalter in einer Hochrisikopopulation
Source: Atypon-hosted journal article supplement (doi:10.1026/0942-5403/a000367), 2022-01-01
Supplement: 0942-5403_a000367_esm1.pdf [file 0942-5403_a000367_esm1.pdf]

## **ESM 1.**

### **Zusätzliche Informationen zu den Messinstrumenten zur Erfassung der Risikofaktoren einer PS**

#### **Psychische Belastung**

Die psychische Belastung der MAZ.-Teilnehmenden wurde anhand dem Massachusetts Youth Screening Instrument – Version 2 (MAYSI-2; Grisso & Barnum, 2000) erhoben. Der MAYSI-2 dient als Screeningverfahren psychischer Probleme bei Jugendlichen und besteht aus 52 Items auf 7 Skalen verteilt: Alkohol/Drogenkonsum (AD), Ärger/Reizbar (ÄR), Depressiv-Ängstlich (DÄ), Somatische Beschwerden (SB), Suizidgedanken (SG), Gedächtnisstörungen (DS; nur für Jungs) und Traumatische Erfahrungen (TE). Für jede Skala können die Werte in die Bereiche „unauffällig“ „Grenzwert“ oder „auffällig“ eingeteilt werden. Für diesen Beitrag, wurden lediglich die auffälligen Werte der Skalen AD, ÄR und DÄ verwendet.

#### **Temperament**

Das Temperament der MAZ.-Teilnehmenden wurde durch das Junior Temperament and Character Inventory (JTCI; Goth & Schmeck, 2009) erfasst. Das JTC ist ein Verfahren zur Selbsteinschätzung von Temperament- (Neugierverhalten, Schadensvermeidung, Belohnungsabhängigkeit, Beharrungsvermögen) und Charaktermerkmalen (Selbstlenkungsfähigkeit, Kooperation, Selbsttranszendenz). Das JTCI besteht aus 84 Items, welche auf einer 5-Punkte Likert Skala kodiert werden (0 = ja, 1 = eher ja, 2 = teilweise, 3 = eher nein, 4 = nein). Die Skalenwerte können aufgrund von Normwerten jeweils einem unterdurchschnittlichen, durchschnittlichen und überdurchschnittlichen Bereich zugeordnet werden. Für den vorliegenden Beitrag, wurde lediglich die T-Werte der Selbstlenkungsfähigkeits-Skala berücksichtigt.

#### **Misshandlungserfahrungen**

Die in der Kindheit vorgekommenen Misshandlungserfahrungen wurden rückblickend während der JAEL-Studie anhand des Childhood Trauma Questionnaire - Short form (CTQ-SF; Bernstein et al., 1998) erhoben. Die Kurzversion beinhaltet 28 Fragen aus fünf Skalen (emotionaler Missbrauch, körperlicher Missbrauch, sexueller Missbrauch, emotionale Vernachlässigung, körperliche Vernachlässigung) mit je 5 Items und

einer Offenheitsskala mit 3 Items. Basierend auf den Normdaten von (Häuser et al., 2011) können Schweregrad-Scores für jede Subskala von "nicht-minimal", "minimal-mäßig", "mäßig-schwer" bis "schwer-extrem" berechnet werden. In dem vorliegenden Beitrag wurde ein Schweregrad von mindestens "mäßig-schwer" gewählt."

### **Psychopathische Persönlichkeitsmerkmale**

Psychopathische Persönlichkeitsmerkmale unter den MAZ.-Teilnehmenden wurden mit dem Youth Psychopathic traits Inventory (YPI; Köhler et al., 2010) erfasst. Das YPI ist ein 50-Item-Selbstbericht-Fragebogen für Jugendliche im Alter von 12 bis 18 Jahren und erfasst zehn Subskalen verteilt auf drei Faktoren: Grandios/Manipulativ, Gefühllos/Unemotional und Impulsiv/Verantwortungslos. Jedes Item wird auf einer 4-Punkte-Likert-Skala bewertet (1 = trifft überhaupt nicht zu, 2 = trifft nicht gut zu, 3 = trifft ziemlich gut zu, 4 = trifft sehr gut zu). Es können Rohwerte und Mittelwerte für die zehn Subskalen, die drei Faktoren und ein Gesamtwert berechnet werden. In der vorliegenden Arbeit wurde lediglich der Mittelwert über die Gesamtskala berücksichtigt.

### **Delinquenz**

Die Deliktschwere der MAZ.-Teilnehmenden wurde anhand einer adaptierten Version des kriminologischen Fragebogens aus der Münsteraner Längsschnittstudie im Selbsturteil erfasst (Boers & Reinecke, 2007). Der Schweregrad der Delikte wurde in 5 Kategorien eingeteilt: 0 = keine Delikte, 1 = Leichte Delikte, 2 = Mittelschwere, 3 = 7 unterschiedliche Delikte, 4 = mehr als 7 unterschiedliche Delikte.
