# Supplementary material for: Risikofaktoren für und Stabilität einer Persönlichkeitsstörung vom Jugendalter bis ins junge Erwachsenenalter in einer Hochrisikopopulation
Source: Atypon-hosted journal article supplement (doi:10.1026/0942-5403/a000367), 2022-01-01
Supplement: 0942-5403_a000367_esm2.pdf [file 0942-5403_a000367_esm2.pdf]

## ESM 2.

**Tabelle E1.** Deskriptive Beschreibung der Risikofaktoren ( $N = 180$ )

| Risikofaktoren im Jugendalter           | Gesamt                    | Stichprobengröße <sup>a</sup> |
|-----------------------------------------|---------------------------|-------------------------------|
|                                         | <i>MW (SD)</i>            | <i>N</i>                      |
| Persönlichkeit / Persönlichkeitsstörung |                           |                               |
| Vorhandensein einer PS                  | 36 (26.1)                 | $N = 138$                     |
| Psychopathische Persönlichkeitszüge     | 11.39 (2.6) <sup>b</sup>  | $N = 161$                     |
| Selbstlenkungsfähigkeit                 | 47.48 (11.7) <sup>c</sup> | $N = 160$                     |
| Psychische Belastung                    |                           | $N = 159$                     |
| Internalisierende Störung               | 84 (52.8)                 |                               |
| Externalisierende Störung               | 89 (56.0)                 |                               |
| Substanzmissbrauch                      | 51 (32.1)                 |                               |
| Suizidalität                            | 72 (45.3)                 |                               |
| Misshandlungserfahrungen                |                           | $N = 179$                     |
| Emotionale Vernachlässigung             | 108 (60.3)                |                               |
| Körperliche Vernachlässigung            | 90 (50.3)                 |                               |
| Körperlicher Missbrauch                 | 58 (32.4)                 |                               |
| Emotionaler Missbrauch                  | 44 (24.6)                 |                               |
| Sexueller Missbrauch                    | 37 (20.7)                 |                               |
| Delinquenz                              |                           | $N = 180$                     |
| Deliktschwere                           |                           |                               |
| Leichte                                 | 21 (13.4)                 |                               |
| Mittelschwere                           | 29 (18.5)                 |                               |
| Schwere (7 unterschiedliche Delikte)    | 38 (24.2)                 |                               |
| Schwere (> 7 unterschiedliche Delikte)  | 47 (29.9)                 |                               |

*Anmerkungen:* <sup>a</sup> Aufgrund fehlender Werte in den einzelnen Variablen, variierte die Stichprobengröße zwischen 138 und 180 Teilnehmenden. <sup>b</sup> Mittelwert (*SD*) des Gesamtwertes. <sup>c</sup> Mittelwert des T-Wertes basierend auf der Normstichprobe (*SD*).
